# Supplementary material for: Structural Basis for Mitotic Centrosome Assembly in Flies
Source: PubMed Central journal article supplement (PMC5457487; doi:10.1016/j.cell.2017.05.030), 2017-06-01
Supplement: mmc1.pdf [file mmc1.pdf]

**Cell, Volume 169**

## **Supplemental Information**

### **Structural Basis for Mitotic**

### **Centrosome Assembly in Flies**

**Zhe Feng, Anna Caballe, Alan Wainman, Steven Johnson, Andreas F.M. Haensele, Matthew A. Cottee, Paul T. Conduit, Susan M. Lea, and Jordan W. Raff**

| Crystal form                          | CF-1                                                                                 | CF-2                                              | CF-2                                              | CF-3                                                     | CF-4                                                        | CF-5                                                                               |
|---------------------------------------|--------------------------------------------------------------------------------------|---------------------------------------------------|---------------------------------------------------|----------------------------------------------------------|-------------------------------------------------------------|------------------------------------------------------------------------------------|
| Crystal contents                      | LZ:CM2 WT                                                                            | LZ:CM2 WT                                         | LZ:CM2 L535E                                      | LZ:CM2 L535E                                             | LZ:CM2 WT                                                   | CM2 WT                                                                             |
| Construct boundaries                  | 490-552:1082-1148                                                                    | 490-544:1082-1148                                 | 490-544:1082-1148                                 | 490-544:1082-1148                                        | 490-567:1082-1148                                           | 1082-1148                                                                          |
| Crystallization condition             | MD-Morpheus B6<br>30% EDO-PEG8K,<br>0.1M Buffer system 2<br>pH7.5,<br>0.09M Halogens | 20%(w/v) PEG6K,<br>0.1M Tris pH8.0,<br>0.2M MgCl2 | 15%(w/v) PEG4K,<br>0.2M imidazole<br>malate pH7.0 | 18%(w/v)<br>PEG2KMME,<br>0.2M sodium<br>cacodylate pH6.5 | 20% (w/v) PEG 3350,<br>0.2M<br>potassium/sodium<br>tartrate | 14.4% (w/v) PEG8K,<br>80mM sodium<br>cacodylate pH6.5,<br>160mM calcium<br>acetate |
| PDB Code                              |                                                                                      | PDB: 5MVW                                         | PDB: 5MW0                                         | PDB: 5MW9                                                | PDB: 5MWE                                                   | PDB: 5I7C                                                                          |
|                                       |                                                                                      |                                                   |                                                   |                                                          |                                                             |                                                                                    |
| Data collection statistics            |                                                                                      |                                                   |                                                   |                                                          |                                                             |                                                                                    |
| Beamline                              | ESRF ID23-1                                                                          | Diamond I04                                       | Petra III P13                                     | Petra III P13                                            | Diamond I03                                                 | Diamond I04                                                                        |
| Wavelength (Å)                        | 1.282                                                                                | 1.28229                                           | 0.97623                                           | 0.97623                                                  | 0.9763                                                      | 0.9793                                                                             |
| Resolution limits (Å) <sup>a</sup>    | 61.20-2.27 (2.28-2.27)                                                               | 69.07-1.82 (1.87-1.82)                            | 31.19-2.00 (2.05-2.00)                            | 31.36-2.20 (2.27-2.20)                                   | 36.10-2.02 (2.07-2.02)                                      | 70.4-2.8 (2.9-2.8)                                                                 |
| Space group                           | P2 <sub>1</sub> 2 <sub>1</sub> 2 <sub>1</sub>                                        | P2 <sub>1</sub>                                   | P2 <sub>1</sub>                                   | C2                                                       | C2                                                          | P6 <sub>1</sub>                                                                    |
| Unit cell dimensions (Å, °)           | 33.9,85.6,87.5,90,90,<br>90                                                          | 44.9,44.3,72.5,90,<br>107.8,90                    | 45.8,43.9,68.6,90,<br>108.3,90                    | 275.8,43.0,48.4,90,<br>96.6,90                           | 196.0,36.5,43.8,90,<br>102.8,90                             | 49.2,49.2,211.2,90,<br>90,120                                                      |
| Unique reflections                    | 12380 (119)                                                                          | 24465 (1806)                                      | 17198 (1246)                                      | 27935 (2406)                                             | 19929 (1450)                                                | 7171 (548)                                                                         |
| Multiplicity <sup>a</sup>             | 13.1 (14.1)                                                                          | 16.9 (17.0)                                       | 3.0 (3.1)                                         | 2.9 (2.9)                                                | 3.3 (3.3)                                                   | 10.4 (10.1)                                                                        |
| Completeness (%) <sup>a</sup>         | 100.0 (100.0)                                                                        | 99.5 (99.8)                                       | 97.2 (97.6)                                       | 96.4 (96.7)                                              | 98.8 (98.7)                                                 | 99.9 (100.0)                                                                       |
| $\ I\sigma(I)\ ^a$                    | 13.1 (2.0)                                                                           | 22.9 (1.1)                                        | 6.1 (1.8)                                         | 6.7 (1.5)                                                | 18.2 (2.1)                                                  | 19.7 (1.4)                                                                         |
| $R_{\text{merge}}$ (%) <sup>a,b</sup> | 0.13 (1.25)                                                                          | 0.08 (3.05)                                       | 0.07 (0.32)                                       | 0.07 (0.75)                                              | 0.03 (0.62)                                                 | 0.07 (1.67)                                                                        |
| $R_{\text{pim}}$ (%)                  | 0.04 (0.34)                                                                          | 0.02 (0.76)                                       | 0.05 (0.22)                                       | 0.05 (0.53)                                              | 0.02 (0.40)                                                 | 0.02 (0.55)                                                                        |
| Processing programs                   | autoPROC                                                                             | Xia2                                              | Mosflm/Aimless                                    | Mosflm/Aimless                                           | Xia2                                                        | Xia2                                                                               |
|                                       |                                                                                      |                                                   |                                                   |                                                          |                                                             |                                                                                    |
| Refinement statistics                 |                                                                                      |                                                   |                                                   |                                                          |                                                             |                                                                                    |

|                                               |  |                        |                        |                        |                        |                    |
|-----------------------------------------------|--|------------------------|------------------------|------------------------|------------------------|--------------------|
| Resolution limits (Å)                         |  | 42.74-1.82 (1.89-1.82) | 31.19-2.00 (2.13-2.00) | 31.35-2.20 (2.29-2.20) | 36.10-2.02 (2.13-2.02) | 42.6-2.8 (3.2-2.8) |
| Number of reflections in working set          |  | 23200 (2568)           | 16220 (2656)           | 26625 (2895)           | 18985 (2696)           | 7100 (2235)        |
| Number of reflections in test set             |  | 1247 (133)             | 883 (146)              | 1240 (167)             | 941 (132)              | 369 (137)          |
| <i>R</i> factor of working set <sup>a,c</sup> |  | 0.223 (0.374)          | 0.237 (0.298)          | 0.258 (0.374)          | 0.228 (0.356)          | 0.243 (0.306)      |
| <i>R</i> <sub>free</sub> <sup>a,d</sup>       |  | 0.246 (0.378)          | 0.264 (0.336)          | 0.302 (0.404)          | 0.269 (0.458)          | 0.268 (0.392)      |
| Number of atoms (protein/water/other)         |  | 1697/208/14            | 1797/142/1             | 3651/77/2              | 1420/26/52             | 1953/0/2           |
| Residues in Ramachandran favoured region (%)  |  | 100                    | 99.1                   | 98.6                   | 98.8                   | 99.6               |
| Ramachandran outliers (%)                     |  | 0                      | 0.47                   | 0.46                   | 0.59                   | 0                  |
| r.m.s.d. bond lengths (Å)                     |  | 0.005                  | 0.005                  | 0.002                  | 0.005                  | 0.003              |
| r.m.s.d. bond angles (°)                      |  | 0.559                  | 0.574                  | 0.311                  | 0.568                  | 0.60               |

<sup>a</sup>Numbers in parentheses refer to the appropriate outer shell.

<sup>b</sup> $R_{\text{merge}} = 100 \times (\sum_{\text{hkl}} \sum_i |I(\text{hkl};i) - \langle I(\text{hkl}) \rangle| / \sum_{\text{hkl}} \sum_i I(\text{hkl};i))$ , where  $I(\text{hkl};i)$  is the intensity of an individual measurement of a reflection and  $\langle I(\text{hkl}) \rangle$  is the average intensity of that reflection.

<sup>c</sup> $R_{\text{factor}} = (\sum_{\text{hkl}} ||F_{\text{obs}}| - |F_{\text{calc}}|| / \sum_{\text{hkl}} |F_{\text{obs}}|)$ , where  $|F_{\text{obs}}|$  and  $|F_{\text{calc}}|$  are the observed and calculated structure factor amplitudes.

<sup>d</sup> $R_{\text{free}}$  equals the *R*-factor of test set (5% of the data removed prior to refinement).

r.m.s.d.: root mean square deviation from ideal geometry.

### Table S1.

Related to Figures 2, 4, S1 and S3: Crystallographic data collection and refinement statistics.
