# Supplementary material for: Structural Basis for Mitotic Centrosome Assembly in Flies
Source: PubMed Central journal article supplement (PMC5457487; doi:10.1016/j.cell.2017.05.030), 2017-06-01
Supplement: mmc2.pdf [file mmc2.pdf]

| Oligonucleotide name                   | Sequence (5' to 3')                             |
|----------------------------------------|-------------------------------------------------|
| <i>Primers for LZ point mutations</i>  |                                                 |
| L528E_F                                | CATCGATGTCTGCAGTGTGGAGACAAACCGATTGGAAGAGCTG     |
| L528E_R                                | CAGCTCTTCCAATCGGTTTGTCTCCACACTGCAGACATCGATG     |
| L532E_F                                | GCAGTGTGCTGACAAACCGAGAGGAAGAGCTGGCTGGTTTCCTC    |
| L532E_R                                | GAGGAAACCAGCCAGCTCTTCTCTCGGTTTGTGAGCACACTGC     |
| L535E_F                                | CTGACAAACCGATTGGAAGAGGAGGCTGGTTTCCTCAACTCTCT    |
| L535E_R                                | CAGAGAGTTGAGGAAACCAGCCTCCTCTTCCAATCGGTTTGTCA    |
| L539E_F                                | GGAAGAGCTGGCTGGTTTCGAGAACTCTCTGCTGAAGCAC        |
| L539E_R                                | GTGCTTCAGCAGAGAGTTCTCGAAACCAGCCAGCTCTTCC        |
| L542E_F                                | CTGGCTGGTTTCCTCAACTCTGAGCTGAAGCACAAAGATGTTCTT   |
| L542E_R                                | CAAGAACATCTTTGTGCTTCAGCTCAGAGTTGAGGAAACCAGCC    |
| <i>Primers for CM2 point mutations</i> |                                                 |
| H1082C1084EE_F                         | GCAACTGGTGCAGCCACAGTAGAGGACGAGGCCAAGGTAGATC     |
| H1082C1084EE_R                         | GTTTTCAAGATCTACCTTGGCCTCGTCTCTACTGTGGCTGCACC    |
| I1126E_F                               | GCAAAAGCACAAAGTTGAGAAAGACGAGAAAAATCAAATACTAAAA  |
| I1126E_R                               | GCGTTTTTAGTATTTGATTTTTCTCGTCTTTCTCAACTTGTGCTTTT |
| T1133E_F                               | GACATCAAAAATCAAATACTAAAAGAGCACAAATGTGCTGCGAAAC  |
| T1133E_R                               | GCGAACGTTTTCGCAGCACATTGTGCTCTTTTAGTATTTGATTTTT  |
| L1137E_F                               | CAAATACTAAAAACGCACAATGTGGAGCGAAACGTTGCTCAAA     |
| L1137E_R                               | CCATGTTTGAGCGAACGTTTCGCTCCACATTGTGCGTTTTTAGTA   |
| R1141H_F                               | CGCACAATGTGCTGCGAAACGTTTATTCAAACATGGAGAATGAG    |
| R1141H_R                               | CCTATAACTCATTCTCCATGTTTGAATGAACGTTTCGCAGCACAT   |
| <i>Primers for LZ fragments</i>        |                                                 |
| Cnn490_F                               | TCCAGGGGCCCATGGATCAACAGAACAGCGCTG               |
| Cnn544_R                               | CTCGAGTGCGGCCGCTTACTTCAGCAGAGAGTTGAGGAAAC       |
| Cnn552_R                               | CTCGAGTGCGGCCGCTTACAACACGCCAAGAACATC            |
| Cnn567_R                               | CTCGAGTGCGGCCGCTTACAAGCTGCGATCCACC              |
| <i>Primers for CM2 fragment</i>        |                                                 |
| Cnn1082_F                              | TACTTCCAGGGTGGATCCCACGACTGTGCCAAGGTAGATC        |
| Cnn1148_R                              | CAGGTTTTCGCCGAATTCTAACTCATTCTCCATGTTTGAGCG      |

**Table S2.**  
 Related to STAR Methods Key Resource Table (Oligonucleotides section):  
 List of primers used in this paper.
